# Supplementary material
Source: Springer Nature journal article supplement (https://www.springermedizin.de/resource/supplementary/12886_2011_215_MOESM1_ESM.pdf/9473540)
Supplement: MOESM1 [file 9473540]

Recruit from:  
• Vision outreach programs  
• Hospitals

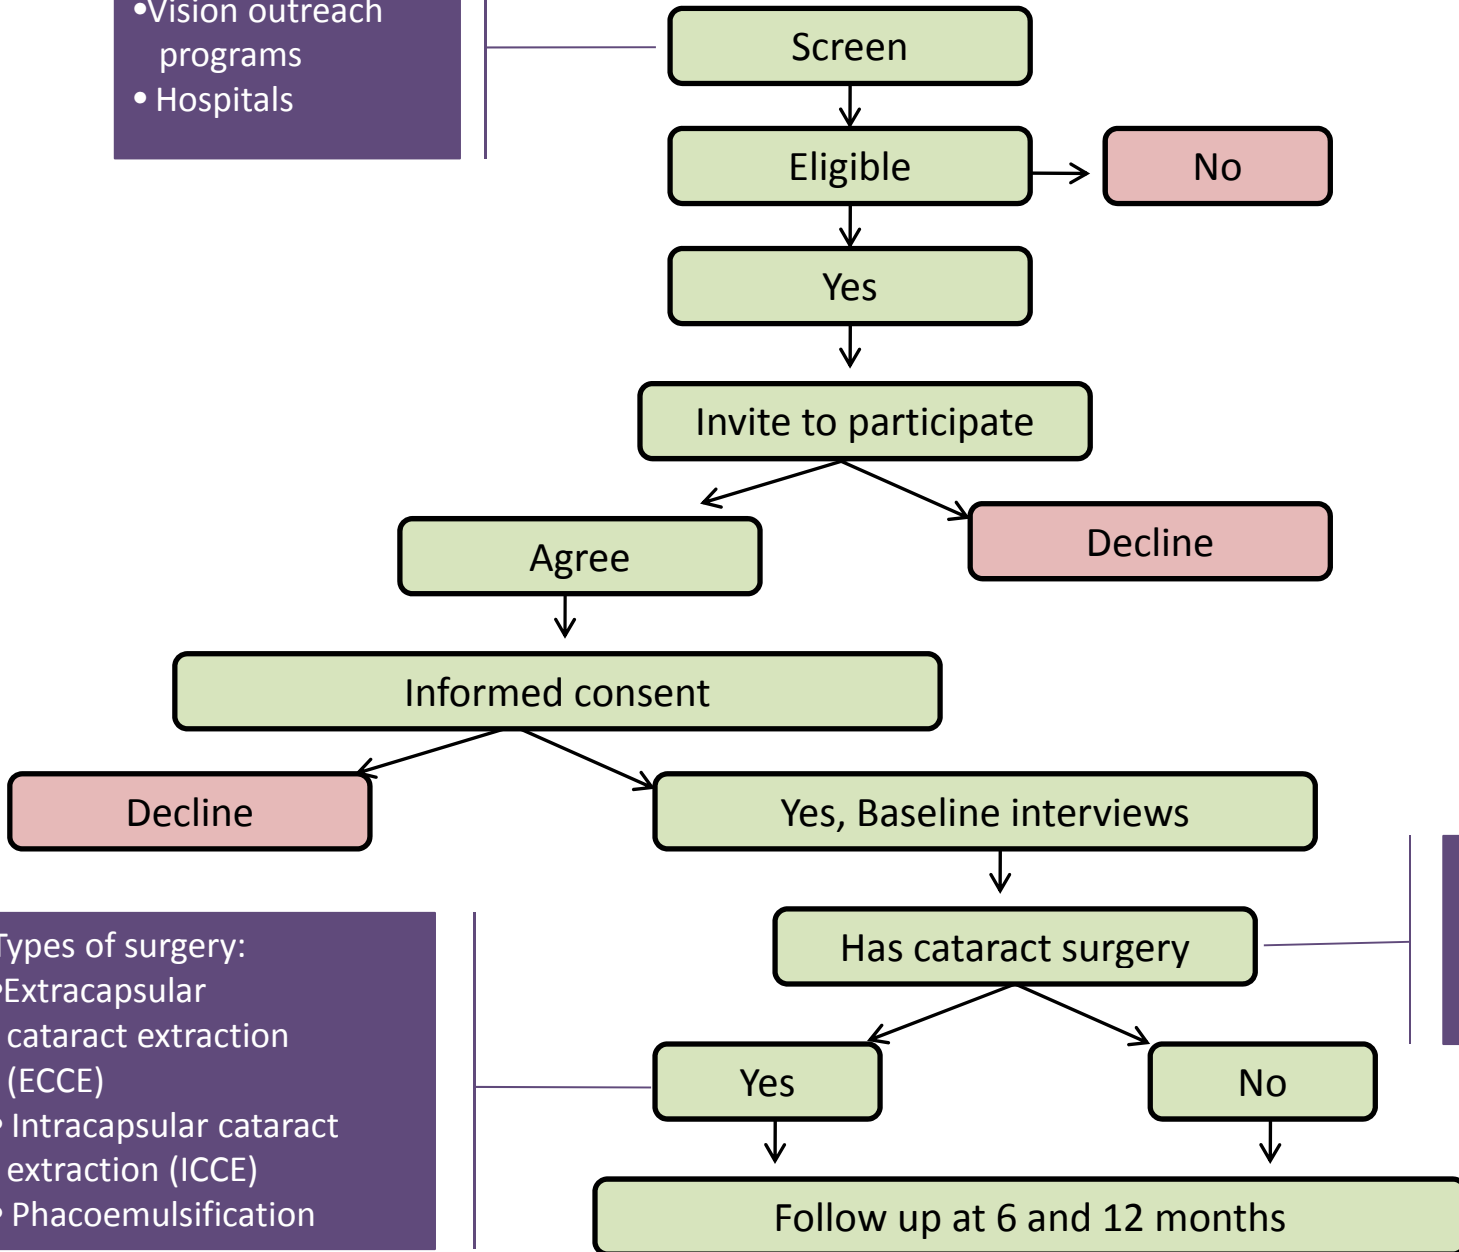

Target : n=400  
(who have cataract surgery)

Types of surgery:  
• Extracapsular cataract extraction (ECCE)  
• Intracapsular cataract extraction (ICCE)  
• Phacoemulsification
